# Supplementary material for: Collar rot, a new symptom of the rice blast disease.
Source: Hindawi journal article supplement (doi:10.1155/2016/9281790), 1974-01-01
Supplement: f1 [file 9281790.f1.pdf]

Supplementary table: The primer sequences, the length of the PCR products and the restriction enzymes used to be analyze SNPs

| SNPs       | Primers                                                                                                       | PCR products(bp) | Restriction enzyme | Fragments(bp) |
|------------|---------------------------------------------------------------------------------------------------------------|------------------|--------------------|---------------|
| rs61973742 | F:5' GTAAAACGACGGCCAGTCCCATAAAAATGCACTTAAATA $\square$ TT 3' <sup>*</sup><br>R: 5' CAAAGATGTCAGTTACTCACAGG 3' | 232              | DraI               | 41+191        |
| rs1338041  | F: 5' GTAAAACGACGGCCAGTTTTGTAAACACCAGGCTATATG $\square$ T 3' <sup>*</sup><br>R: 5' TACAGATGAGGAAACTTAGGCA 3'  | 168              | DraI               | 42+126        |

<sup>\*</sup>primers were mismatched to make a restriction enzyme site.
